# Supplementary material
Source: Springer Nature journal article supplement (https://www.springermedizin.de/resource/supplementary/12885_2010_2205_MOESM1_ESM.pdf/9460758)
Supplement: MOESM1 [file 9460758]

Pubmed  
Cochrane  
PEDro

201 papers were  
retrieved from the  
databases

189 excluded based on  
review of titles and abstracts

- No randomized controlled  
clinical trial
- No use of accelerometer,  
pedometer or step counter
- No measurement of daily  
steps
- Studies in other languages  
as English

12 RCT's were  
analyzed

8 studies were excluded:

- Other population than  
cancer

1 non-published RCT was  
added to the analyses

**5 RCT's** were  
included in the  
analyses.
